# Supplementary material for: Violence and Clinical Learning Environments in Medical Residencies
Source: MDPI journal article supplement (doi:10.3390/ijerph20186754), 2023-09-13
Supplement: s1 [file s1]

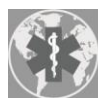

## Supplementary materials:

### Supplementary File 1. Section 3 RMLV questionnaire: Environment at the Clinical Site

3.1. Describe the environment of the site where you work as a resident based on the following adjectives.

| Very unpleasant  | Unpleasant  | Neither pleasant nor unpleasant      | Pleasant     | Very pleasant     |
|------------------|-------------|--------------------------------------|--------------|-------------------|
| 1                | 2           | 3                                    | 4            | 5                 |
| Very competitive | Competitive | Neither competitive nor cooperative  | Cooperative  | Very cooperative  |
| 1                | 2           | 3                                    | 4            | 5                 |
| Very tense       | Tense       | Neither tense nor relaxed            | Relaxed      | Very relaxed      |
| 1                | 2           | 3                                    | 4            | 5                 |
| Very conflictive | Conflictive | Neither conflictive nor constructive | Constructive | Very constructive |
| 1                | 2           | 3                                    | 4            | 5                 |

3.2. What would be the most typical reaction in your direct and daily environment on site (peers, colleagues) to a discriminatory comment? (Mark one option only)

- A. Most would disapprove
- B. Most would tolerate it
- C. Most would approve and continue with the comment

3.3. In a hypothetical situation of abuse, do you think that:

|                                                                                      |     |    |
|--------------------------------------------------------------------------------------|-----|----|
| Victims would run some type of risk if they reported it.                             | YES | NO |
| Aggressors would be penalized at the hospital if they were reported.                 | YES | NO |
| Supporting victims can lead to reprisals against those supporting the abused person. | YES | NO |
| The tolerance of abuse in the institution discourages people from reporting it.      | YES | NO |
| People can be intimidated because abuse is normal at the hospital.                   | YES | NO |

3.4. In your opinion, indicate how much you agree or disagree with the following statements.

- 1. Strongly disagree
- 2. Somewhat disagree
- 3. Neither agree nor disagree
- 4. Somewhat agree
- 5. Strongly agree

|                                                                                                            |
|------------------------------------------------------------------------------------------------------------|
| Punitive rotations are to maintain order among the residents. <del>in the department.</del>                |
| Reprimands are to prevent residents from committing errors.                                                |
| Questioning by professors in front of everyone is to expose those who don't have the answer.               |
| Tasks assigned to residents that are not academic or educational are best done to avoid conflict.          |
| Profanity and vulgar expressions exclude women from the dynamic among residents.                           |
| Negative criticism from some residents toward others can lead to the resignation of the person criticized. |
| The strict application of hospital rules helps encourage a better academic and workplace environment.      |

Source: by the authors

**Supplementary File 2.** Perception of risk in hypothetical situations of violence in hospitals by number of residents and specialty

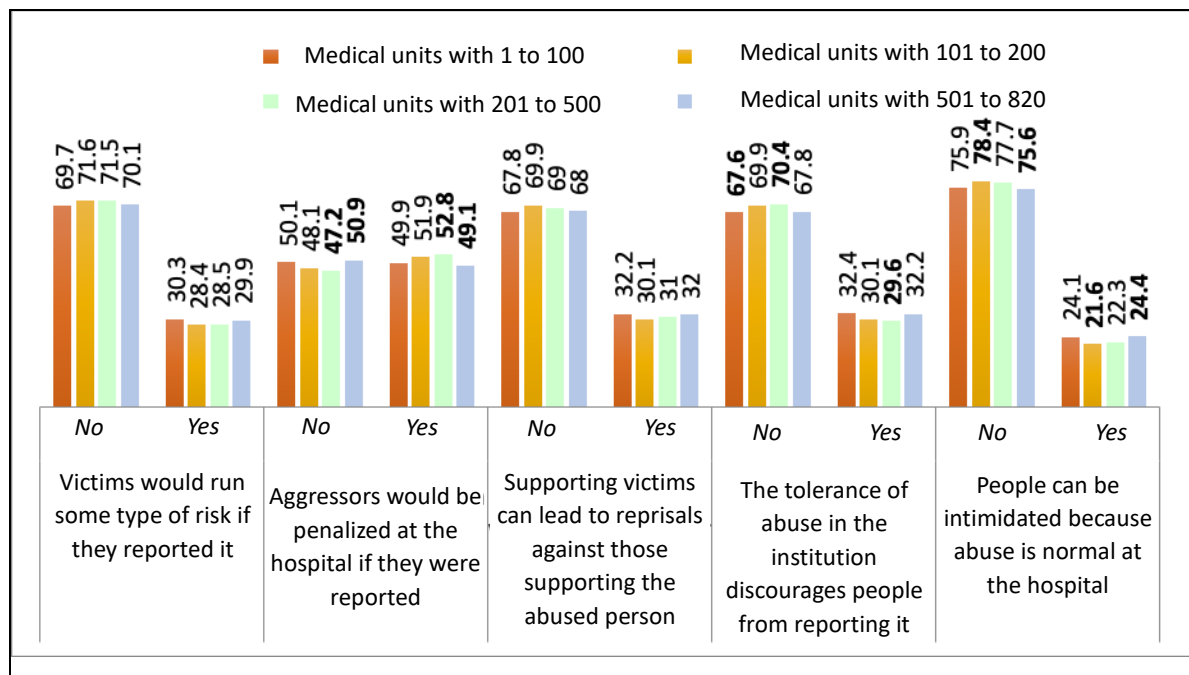

Note. Significant differences ( $p < .05$ ) were obtained with the two-sided equality test for column proportions. Bonferroni correction was used. Differences are shown with percentages highlight-ed in bold Source: by the authors

**Supplementary File 3.** Opinions about common expressions of violence by year of residency (Prompt 3.4)

|                                                                                                           |                            | Year of Residency |             |                 |      |                 |      |                 |             |                 |             | <i>X</i> <sup>2</sup> ( <i>p</i> ) |
|-----------------------------------------------------------------------------------------------------------|----------------------------|-------------------|-------------|-----------------|------|-----------------|------|-----------------|-------------|-----------------|-------------|------------------------------------|
|                                                                                                           |                            | 1 <sup>st</sup>   |             | 2 <sup>nd</sup> |      | 3 <sup>rd</sup> |      | 4 <sup>th</sup> |             | 5 <sup>th</sup> |             |                                    |
|                                                                                                           |                            | <i>n</i>          | %           | <i>n</i>        | %    | <i>n</i>        | %    | <i>n</i>        | %           | <i>n</i>        | %           |                                    |
| Punitive rotations are to maintain order among the residents                                              | Strongly disagree          | 4252              | 82.6        | 2821            | 77.0 | 1817            | 72.2 | 813             | 66.0        | 17              | <b>53.1</b> | 269.97 (0.001)                     |
|                                                                                                           | Somewhat disagree          | 468               | <b>9.1</b>  | 383             | 10.5 | 293             | 11.6 | 167             | 13.6        | 4               | 12.5        |                                    |
|                                                                                                           | Neither agree nor disagree | 247               | <b>4.8</b>  | 269             | 7.3  | 224             | 8.9  | 137             | 11.1        | 4               | 12.5        |                                    |
|                                                                                                           | Somewhat agree             | 127               | <b>2.5</b>  | 137             | 3.7  | 139             | 5.5  | 81              | 6.6         | 7               | 21.9        |                                    |
|                                                                                                           | Strongly agree             | 54                | <b>1.0</b>  | 54              | 1.5  | 44              | 1.7  | 34              | 2.8         | 0 <sup>1</sup>  | 0.0         |                                    |
| Reprimands are to prevent residents from committing errors                                                | Strongly disagree          | 1925              | 37.4        | 1278            | 34.9 | 840             | 33.4 | 373             | 30.3        | 4               | <b>12.5</b> | 81.97 (0.001)                      |
|                                                                                                           | Somewhat disagree          | 1254              | 24.4        | 894             | 24.4 | 561             | 22.3 | 266             | 21.6        | 6               | 18.8        |                                    |
|                                                                                                           | Neither agree nor disagree | 700               | 13.6        | 540             | 14.7 | 375             | 14.9 | 213             | 17.3        | 5               | 15.6        |                                    |
|                                                                                                           | Somewhat agree             | 993               | 19.3        | 746             | 20.4 | 546             | 21.7 | 277             | 22.5        | 13              | <b>40.6</b> |                                    |
|                                                                                                           | Strongly agree             | 276               | 5.4         | 206             | 5.6  | 195             | 7.7  | 103             | 8.4         | 4               | 12.5        |                                    |
| Questioning by professors in front of everyone is to expose those who don't have the answer               | Strongly disagree          | 2375              | 46.1        | 1693            | 46.2 | 1138            | 45.2 | 551             | 44.7        | 11              | 34.4        | 24.50 (0.079)                      |
|                                                                                                           | Somewhat disagree          | 835               | 16.2        | 605             | 16.5 | 470             | 18.7 | 215             | 17.5        | 9               | 28.1        |                                    |
|                                                                                                           | Neither agree nor disagree | 871               | 16.9        | 605             | 16.5 | 429             | 17.0 | 232             | 18.8        | 7               | 21.9        |                                    |
|                                                                                                           | Somewhat agree             | 678               | 13.2        | 483             | 13.2 | 295             | 11.7 | 133             | 10.8        | 5               | 15.6        |                                    |
|                                                                                                           | Strongly agree             | 389               | 7.6         | 278             | 7.6  | 185             | 7.4  | 101             | 8.2         | 0 <sup>1</sup>  | 0.0         |                                    |
| Tasks assigned to residents that are not academic or educational are best done to avoid conflict.         | Strongly disagree          | 2591              | 50.3        | 1810            | 49.4 | 1265            | 50.3 | 601             | 48.8        | 14              | <b>43.8</b> | 28.85 (0.025)                      |
|                                                                                                           | Somewhat disagree          | 823               | 16.0        | 588             | 16.0 | 395             | 15.7 | 192             | 15.6        | 4               | 12.5        |                                    |
|                                                                                                           | Neither agree nor disagree | 785               | 15.2        | 583             | 15.9 | 424             | 16.8 | 244             | <b>19.8</b> | 6               | 18.8        |                                    |
|                                                                                                           | Somewhat agree             | 605               | 11.8        | 438             | 12.0 | 303             | 12.0 | 120             | 9.7         | 4               | 12.5        |                                    |
|                                                                                                           | Strongly agree             | 344               | 6.7         | 245             | 6.7  | 130             | 5.2  | 75              | 6.1         | 4               | 12.5        |                                    |
| Profanity and vulgar expressions exclude women from the dynamic among residents                           | Strongly disagree          | 2788              | 54.2        | 1914            | 52.2 | 1341            | 53.3 | 627             | 50.9        | 19              | 59.4        | 20.35 (0.205)                      |
|                                                                                                           | Somewhat disagree          | 600               | 11.7        | 447             | 12.2 | 330             | 13.1 | 150             | 12.2        | 3               | 9.4         |                                    |
|                                                                                                           | Neither agree nor disagree | 931               | 18.1        | 711             | 19.4 | 485             | 19.3 | 272             | 22.1        | 6               | 18.8        |                                    |
|                                                                                                           | Somewhat agree             | 441               | 8.6         | 317             | 8.7  | 189             | 7.5  | 103             | 8.4         | 2               | 6.3         |                                    |
|                                                                                                           | Strongly agree             | 388               | 7.5         | 275             | 7.5  | 172             | 6.8  | 80              | 6.5         | 2               | 6.3         |                                    |
| Negative criticism from some residents toward others can lead to the resignation of the person criticized | Strongly disagree          | 1499              | 29.1        | 1098            | 30.0 | 772             | 30.7 | 341             | 27.7        | 12              | 37.5        | 81.01 (0.001)                      |
|                                                                                                           | Somewhat disagree          | 528               | 10.3        | 400             | 10.9 | 284             | 11.3 | 146             | 11.9        | 2               | 6.3         |                                    |
|                                                                                                           | Neither agree nor disagree | 660               | <b>12.8</b> | 588             | 16.0 | 417             | 16.6 | 240             | 19.5        | 4               | <b>12.5</b> |                                    |
|                                                                                                           | Somewhat agree             | 1336              | 26.0        | 904             | 24.7 | 577             | 22.9 | 281             | 22.8        | 13              | <b>40.6</b> |                                    |
|                                                                                                           | Strongly agree             | 1125              | 21.9        | 674             | 18.4 | 467             | 18.6 | 224             | 18.2        | 1               | <b>3.1</b>  |                                    |
| The strict application of hospital rules helps encourage a better academic and workplace environment      | Strongly disagree          | 1771              | <b>34.4</b> | 1230            | 33.6 | 822             | 32.7 | 362             | 29.4        | 5               | 15.6        | 32.83 (0.008)                      |
|                                                                                                           | Somewhat disagree          | 1020              | 19.8        | 735             | 20.1 | 474             | 18.8 | 214             | 17.4        | 9               | <b>28.1</b> |                                    |
|                                                                                                           | Neither agree nor disagree | 1107              | 21.5        | 770             | 21.0 | 556             | 22.1 | 307             | 24.9        | 8               | 25.0        |                                    |
|                                                                                                           | Somewhat agree             | 899               | 17.5        | 664             | 18.1 | 481             | 19.1 | 258             | 20.9        | 8               | 25.0        |                                    |
|                                                                                                           | Strongly agree             | 351               | 6.8         | 265             | 7.2  | 184             | 7.3  | 91              | 7.4         | 2               | 6.3         |                                    |

Note: <sup>1</sup> This category was not used in comparisons because its column proportion equals zero or one. Significant differences ( $p < 0.05$ ) were obtained with the two-sided equality test for column proportions. Bonferroni correction was used. The tests assume equal variances. Source: By the authors.
